# Supplementary material for: Long-term Association of Depression Symptoms and Antidepressant Medication Use With Incident Cardiovascular Events in the Look AHEAD (Action for Health in Diabetes) Clinical Trial of Weight Loss in Type 2 Diabetes
Source: Oxford University Press journal article supplement (doi:10.2337/dc18-0575), 2019-03-04
Supplement: dc180575supplementarydata.pdf [file dc180575supplementarydata.pdf]

## SUPPLEMENTARY DATA

### Look AHEAD Research Group at End of Intervention

Updated 08/11/2015

#### Clinical Sites

The Johns Hopkins University Frederick L. Brancati, MD, MHS<sup>1</sup>; Jeanne M. Clark, MD, MPH<sup>1</sup> (Co-Principal Investigators); Lee Swartz<sup>2</sup>; Jeanne Charleston, RN<sup>3</sup>; Lawrence Cheskin, MD<sup>3</sup>; Kerry Stewart, EdD<sup>3</sup>; Richard Rubin, PhD<sup>3</sup>; Jean Arceci, RN; Susanne Danus; David Bolen; Danielle Diggins; Sara Evans; Mia Johnson; Joyce Lambert; Sarah Longenecker; Kathy Michalski, RD; Dawn Jiggetts; Chanchai Sapun; Maria Sowers; Kathy Tyler

Pennington Biomedical Research Center George A. Bray, MD<sup>1</sup>; Allison Strate, RN<sup>2</sup>; Frank L. Greenway, MD<sup>3</sup>; Donna H. Ryan, MD<sup>3</sup>; Donald Williamson, PhD<sup>3</sup>; Timothy Church, MD<sup>3</sup>; Catherine Champagne, PhD, RD; Valerie Myers, PhD; Jennifer Arceneaux, RN; Kristi Rau; Michelle Begnaud, LDN, RD, CDE; Barbara Cerniauskas, LDN, RD, CDE; Crystal Duncan, LPN; Helen Guay, LDN, LPC, RD; Carolyn Johnson, LPN, Lisa Jones; Kim Landry; Missy Lingle; Jennifer Perault; Cindy Puckett; Marisa Smith; Lauren Cox; Monica Lockett, LPN

The University of Alabama at Birmingham Cora E. Lewis, MD, MSPH<sup>1</sup>; Sheikilya Thomas, MPH<sup>2</sup>; Monika Safford, MD<sup>3</sup>; Stephen Glasser, MD<sup>3</sup>; Vicki DiLillo, PhD<sup>3</sup>; Charlotte Bragg, MS, RD, LD; Amy Dobelstein; Sara Hannum, MA; Anne Hubbell, MS; Jane King, MLT; DeLavallade Lee; Andre Morgan; L. Christie Oden; Janet Wallace, MS; Cathy Roche, PhD, RN, BSN; Jackie Roche; Janet Turman

#### Harvard Center

*Massachusetts General Hospital.* David M. Nathan, MD<sup>1</sup>; Enrico Cagliero, MD<sup>3</sup>; Kathryn Hayward, MD<sup>3</sup>; Heather Turgeon, RN, BS, CDE<sup>2</sup>; Valerie Goldman, MS, RD<sup>2</sup>; Linda Delahanty, MS, RD<sup>3</sup>; Ellen Anderson, MS, RD<sup>3</sup>; Laurie Bissett, MS, RD; Virginia Harlan, MSW; Theresa Michel, DPT, DSc, CCS; Mary Larkin, RN; Christine Stevens, RN

*Joslin Diabetes Center:* Edward S. Horton, MD<sup>1</sup>; Sharon D. Jackson, MS, RD, CDE<sup>2</sup>; Osama Hamdy, MD, PhD<sup>3</sup>; A. Enrique Caballero, MD<sup>3</sup>; Sarah Bain, BS; Elizabeth Bovaird, BSN, RN; Barbara Fagnoli, MS, RD; Jeanne Spellman, BS, RD; Kari Galuski, RN; Ann Goebel-Fabbri, PhD; Lori Lambert, MS, RD; Sarah Ledbury, MEd, RD; Maureen Malloy, BS; Kerry Ovalle, MS, RCEP, CDE

*Beth Israel Deaconess Medical Center:* George Blackburn, MD, PhD<sup>1</sup>; Christos Mantzoros, MD, DSc<sup>3</sup>; Ann McNamara, RN; Kristina Spellman, RD

University of Colorado Anschutz Medical Campus James O. Hill, PhD<sup>1</sup>; Marsha Miller, MS RD<sup>2</sup>; Holly Wyatt, MD<sup>3</sup>; Brent Van Dorsten, PhD<sup>3</sup>; Judith Regensteiner, PhD<sup>3</sup>; Debbie Bochert; Ligia Coelho, BS; Paulette Cohrs, RN, BSN; Susan Green; April Hamilton, BS, CCRC; Jere Hamilton, BA; Eugene Leshchinskiy; Loretta Rome, TRS; Terra Thompson, BA; Kirstie Craul, RD, CDE; Cecilia Wang, MD

Baylor College of Medicine John P. Foreyt, PhD<sup>1</sup>; Rebecca S. Reeves, DrPH, RD<sup>2</sup>; Molly Gee, MEd, RD<sup>2</sup>; Henry Pownall, PhD<sup>3</sup>; Ashok Balasubramanyam, MBBS<sup>3</sup>; Chu-Huang Chen, MD, PhD<sup>3</sup>; Peter Jones, MD<sup>3</sup>; Michele Burrington, RD, RN; Allyson Clark Gardner, MS, RD; Sharon Griggs; Michelle Hamilton; Veronica Holley; Sarah Lee; Sarah Lane Liscum, RN, MPH; Susan Cantu-Lumbreras; Julieta Palencia, RN; Jennifer Schmidt; Jayne Thomas, RD; Carolyn White

## SUPPLEMENTARY DATA

### The University of Tennessee Health Science Center

*University of Tennessee East.* Karen C. Johnson, MD, MPH<sup>1</sup>; Carolyn Gresham, RN<sup>2</sup>; Mace Coday, PhD; Lisa Jones, RN; Lynne Lichtermann, RN, BSN; J. Lee Taylor, MEd, MBA; Beate Griffin, RN; Donna Valenski

*University of Tennessee Downtown.* Abbas E. Kitabchi, PhD, MD<sup>1</sup>; Ebenezer Nyenwe, MD<sup>3</sup>; Helen Lambeth, RN, BSN<sup>2</sup>; Moana Mosby, RN; Amy Brewer, MS, RD,LDN; Debra Clark, LPN; Andrea Crisler, MT; Gracie Cunningham; Debra Force, MS, RD, LDN; Donna Green, RN; Robert Kores, PhD; Renate Rosenthal, PhD; Elizabeth Smith, MS, RD, LDN

University of Minnesota Robert W. Jeffery, PhD<sup>1</sup>; Tricia Skarphol, MA<sup>2</sup>; Carolyn Thorson, CCRP<sup>2</sup>; John P. Bantle, MD<sup>3</sup>; J. Bruce Redmon, MD<sup>3</sup>; Richard S. Crow, MD<sup>3</sup>; Kerrin Brelje, MPH, RD; Carolyne Campbell; Lisa Hoelscher, MPH, RD, CHES; Melanie Jaeb, MPH, RD; LaDonna James; Patti Laqua, BS, RD; Vicki A. Maddy, BS, RD; Therese Ockenden, RN; Birgitta I. Rice, MS, RPh, CHES; Ann D. Tucker, BA; Mary Susan Voeller, BA; Cara Walcheck, BS,RD

St. Luke's Roosevelt Hospital Center Xavier Pi-Sunyer, MD<sup>1</sup>; Jennifer Patricio, MS<sup>2</sup>; Carmen Pal, MD<sup>3</sup>; Lynn Allen, MD;Janet Crane, MA, RD, CDN; Lolline Chong, BS, RD; Diane Hirsch, RNC, MS, CDE; Mary Anne Holowaty, MS, CN; Michelle Horowitz, MS, RD

University of Pennsylvania Thomas A. Wadden, PhD<sup>1</sup>; Barbara J. Maschak-Carey, MSN, CDE<sup>2</sup>; Robert I. Berkowitz, MD<sup>3</sup>; Seth Braunstein, MD, PhD<sup>3</sup>; Gary Foster, PhD<sup>3</sup>; Henry Glick, PhD<sup>3</sup>; Shiriki Kumanyika, PhD, RD, MPH<sup>3</sup>; Stanley S. Schwartz, MD<sup>3</sup>; Yuliis Bell, BA; Raymond Carvajal, PsyD; Helen Chomentowski; Renee Davenport; Anthony Fabricatore, PhD; Lucy Faulconbridge, PhD; Louise Hesson, MSN, CRNP; Nayyar Iqbal, MD; Robert Kuehnel, PhD; Patricia Lipschutz, MSN; Monica Mullen, RD, MPH

University of Pittsburgh John M. Jakicic, PhD<sup>1</sup>; David E. Kelley, MD<sup>1</sup>; Jacqueline Wesche-Thobaben, RN, BSN, CDE<sup>2</sup>; Lewis H. Kuller, MD, DrPH<sup>3</sup>; Andrea Kriska, PhD<sup>3</sup>; Amy D. Rickman, PhD, RD, LDN<sup>3</sup>; Lin Ewing, PhD, RN<sup>3</sup>; Mary Korytkowski, MD<sup>3</sup>; Daniel Edmundowicz, MD<sup>3</sup>; Rose Salata, MD<sup>3</sup>; Rebecca Danchenko, BS; Tammy DeBruce; Barbara Elnyczky; David O. Garcia, MS; Patricia H. Harper, MS, RD, LDN; Susan Harrier, BS; Dianne Heidingsfelder, MS, RD, CDE, LDN; Diane Ives, MPH; Juliet Mancino, MS, RD, CDE, LDN; Lisa Martich, MS, RD; Tracey Y. Murray, BS; Karen Quirin; Joan R. Ritchea; Susan Copelli, BS, CTR

The Miriam Hospital/Brown Medical School Rena R. Wing, PhD<sup>1</sup>; Renee Bright, MS<sup>2</sup>; Vincent Pera, MD<sup>3</sup>; John Jakicic, PhD<sup>3</sup>; Deborah Tate, PhD<sup>3</sup>; Amy Gorin, PhD<sup>3</sup>; Kara Gallagher, PhD<sup>3</sup>; Amy Bach, PhD; Barbara Bancroft, RN, MS; Anna Bertorelli, MBA, RD; Richard Carey, BS; Tatum Charron, BS; Heather Chenot, MS; Kimberley Chula-Maguire, MS; Pamela Coward, MS, RD; Lisa Cronkite, BS; Julie Currin, MD; Maureen Daly, RN; Caitlin Egan, MS; Erica Ferguson, BS, RD; Linda Foss, MPH; Jennifer Gauvin, BS; Don Kieffer, PhD; Lauren Lessard, BS; Deborah Maier, MS; JP Massaro, BS; Tammy Monk, MS; Rob Nicholson, PhD; Erin Patterson, BS; Suzanne Phelan, PhD; Hollie Raynor, PhD, RD; Douglas Raynor, PhD; Natalie Robinson, MS, RD; Deborah Robles; Jane Tavares, BS

The University of Texas Health Science Center at San Antonio Steven M. Haffner, MD<sup>1</sup>; Helen P. Hazuda, PhD<sup>1</sup>; Maria G. Montez, RN, MSHP, CDE<sup>2</sup>; Carlos Lorenzo, MD<sup>3</sup>; Charles F. Coleman, MS, RD; Domingo Granado, RN; Kathy Hathaway, MS, RD; Juan Carlos Isaac, RC, BSN; Nora Ramirez, RN, BSN

## SUPPLEMENTARY DATA

VA Puget Sound Health Care System / University of Washington Steven E. Kahn, MB, ChB<sup>1</sup>; Anne Murillo, BS<sup>2</sup>; Robert Knopp, MD<sup>3</sup>; Edward Lipkin, MD, PhD<sup>3</sup>; Dace Trence, MD<sup>3</sup>; Elaine Tsai, MD<sup>3</sup>; Basma Fattaleh, BA; Diane Greenberg, PhD; Brenda Montgomery, RN, MS, CDE; Ivy Morgan-Taggart; Betty Ann Richmond, MEd; Jolanta Socha, BS; April Thomas, MPH, RD; Alan Wesley, BA; Diane Wheeler, RD, CDE

Southwestern American Indian Center, Phoenix, Arizona and Shiprock, New Mexico William C. Knowler, MD, DrPH<sup>1</sup>; Paula Bolin, RN, MC<sup>2</sup>; Tina Killean, BS<sup>2</sup>; Cathy Manus, LPN<sup>3</sup>; Jonathan Krakoff, MD<sup>3</sup>; Jeffrey M. Curtis, MD, MPH<sup>3</sup>; Sara Michaels, MD<sup>3</sup>; Paul Bloomquist, MD<sup>3</sup>; Peter H. Bennett, MB, FRCP<sup>3</sup>; Bernadita Fallis RN, RHIT, CCS; Diane F. Hollowbreast; Ruby Johnson; Maria Meacham, BSN, RN, CDE; Christina Morris, BA; Julie Nelson, RD; Carol Percy, RN; Patricia Poorthunder; Sandra Sangster; Leigh A. Shovestull, RD, CDE; Miranda Smart; Janelia Smiley; Teddy Thomas, BS; Katie Toledo, MS, LPC

University of Southern California Anne Peters, MD<sup>1</sup>; Siran Ghazarian, MD<sup>2</sup>; Elizabeth Beale, MD<sup>3</sup>; Kati Konersman, RD, CDE; Brenda Quintero-Varela; Edgar Ramirez; Gabriela Rios, RD; Gabriela Rodriguez, MA; Valerie Ruelas MSW, LCSW; Sara Serafin-Dokhan; Martha Walker, RD

### **Coordinating Center**

Wake Forest University Mark A. Espeland, PhD<sup>1</sup>; Judy L. Bahnson, BA, CCRP<sup>3</sup>; Lynne E. Wagenknecht, DrPH<sup>3</sup>; David Reboussin, PhD<sup>3</sup>; W. Jack Rejeski, PhD<sup>3</sup>; Alain G. Bertoni, MD, MPH<sup>3</sup>; Wei Lang, PhD<sup>3</sup>; Michael S. Lawlor, PhD<sup>3</sup>; David Lefkowitz, MD<sup>3</sup>; Gary D. Miller, PhD<sup>3</sup>; Patrick S. Reynolds, MD<sup>3</sup>; Paul M. Ribisl, PhD<sup>3</sup>; Mara Vitolins, DrPH<sup>3</sup>; Daniel Beavers, PhD<sup>3</sup>; Haiying Chen, PhD, MM<sup>3</sup>; Dalane Kitzman, MD<sup>3</sup>; Delia S. West, PhD<sup>3</sup>; Lawrence M. Friedman, MD<sup>3</sup>; Ron Prineas, MD<sup>3</sup>; Tandaw Samdarshi, MD<sup>3</sup>; Kathy M. Dotson, BA<sup>2</sup>; Amelia Hodges, BS, CCRP<sup>2</sup>; Dominique Limprevil-Divers, MA, MEd<sup>2</sup>; Karen Wall<sup>2</sup>; Carrie C. Williams, MA, CCRP<sup>2</sup>; Andrea Anderson, MS; Jerry M. Barnes, MA; Mary Barr; Tara D. Beckner; Cralen Davis, MS; Thania Del Valle-Fagan, MD; Tamika Earl, Melanie Franks, BBA; Candace Goode; Jason Griffin, BS; Lea Harvin, BS; Mary A. Hontz, BA; Sarah A. Gaussoin, MS; Don G. Hire, BS; Patricia Hogan, MS; Mark King, BS; Kathy Lane, BS; Rebecca H. Neiberg, MS; Julia T. Rushing, MS; Valery S. Effoe, MD,MS; Michael P. Walkup, MS; Terri Windham

### **Central Resources Centers**

DXA Reading Center, University of California at San Francisco Michael Nevitt, PhD<sup>1</sup>; Ann Schwartz, PhD<sup>2</sup>; John Shepherd, PhD<sup>3</sup>; Michaela Rahorst; Lisa Palermo, MS, MA; Susan Ewing, MS; Cynthia Hayashi; Jason Maeda, MPH

### **Central Laboratory, Northwest Lipid Metabolism and Diabetes Research**

Laboratories Santica M. Marcovina, PhD, ScD<sup>1</sup>; Jessica Hurting<sup>2</sup>; John J. Albers, PhD<sup>3</sup>; Vinod Gaur, PhD<sup>4</sup>

### **ECG Reading Center, EPICARE, Wake Forest University School of Medicine**

Elsayed Z. Soliman MD, MSc, MS<sup>1</sup>; Charles Campbell<sup>2</sup>; Zhu-Ming Zhang, MD<sup>3</sup>; Mary Barr; Susan Hensley; Julie Hu; Lisa Keasler; Yabing Li, MD

### **Diet Assessment Center, University of South Carolina, Arnold School of Public Health, Center for Research in Nutrition and Health Disparities**

Elizabeth J Mayer-Davis, PhD<sup>1</sup>; Robert Moran, PhD<sup>1</sup>

## SUPPLEMENTARY DATA

Hall-Foushee Communications, Inc.

Richard Foushee, PhD; Nancy J. Hall, MA

### **Federal Sponsors**

National Institute of Diabetes and Digestive and Kidney Diseases Mary Evans, PhD; Barbara Harrison, MS; Van S. Hubbard, MD, PhD; Susan Z. Yanovski, MD

National Heart, Lung, and Blood Institute Lawton S. Cooper, MD, MPH; Peter Kaufman, PhD, FABMR; Mario Stylianou, PhD

Centers for Disease Control and Prevention Edward W. Gregg, PhD; Ping Zhang, PhD

---

<sup>1</sup> Principal Investigator

<sup>2</sup> Program Coordinator

<sup>3</sup> Co-Investigator

All other Look AHEAD staffs are listed alphabetically by site.

SUPPLEMENTARY DATA

**Supplementary Table S1.** Frequency of Component Events in the Composite Primary and Secondary Outcomes by Sex

| Total Outcome and Outcome Components | Primary Outcome Events |     | Secondary Outcome 1 Events |     | Secondary Outcome 2 Events |     | Secondary Outcome 3 Events |     |
|--------------------------------------|------------------------|-----|----------------------------|-----|----------------------------|-----|----------------------------|-----|
|                                      | M                      | F   | M                          | F   | M                          | F   | M                          | F   |
| Total Composite Outcome              | 482                    | 355 | 320                        | 242 | 600                        | 477 | 689                        | 539 |
| Any Death                            |                        |     |                            |     | 244                        | 190 | 244                        | 190 |
| CVD Death                            | 78                     | 33  | 78                         | 33  |                            |     |                            |     |
| Nonfatal MI                          | 208                    | 144 | 208                        | 144 | 208                        | 144 | 208                        | 144 |
| Nonfatal Stroke                      | 72                     | 83  | 72                         | 83  | 72                         | 83  | 72                         | 83  |
| Hospitalized Angina                  | 240                    | 154 |                            |     | 240                        | 154 | 240                        | 154 |
| CABG                                 |                        |     |                            |     |                            |     | 347                        | 185 |
| CHF                                  |                        |     |                            |     |                            |     | 133                        | 87  |
| CEA                                  |                        |     |                            |     |                            |     | 32                         | 25  |
| PVD                                  |                        |     |                            |     |                            |     | 52                         | 35  |

Abbreviations: CVD = cardiovascular disease, MI = myocardial infarction, CABG = coronary artery bypass graft, CHF = congestive heart failure, CEA = carotid endarterectomy. PVD = peripheral vascular disease. The sum of component CVD events exceeds the number of events in the composite outcomes because a single individual could have a first occurrence of more than one component event during the same hospital admission, but only one event counted toward the composite outcome. Eleven participants had multiple Primary Outcome events, 4 participants had multiple Secondary Outcome 1 events, 11 participants had multiple Secondary Outcome 2 events, and 418 participants had multiple Secondary Outcome 3 events. In men, 268 of 689 (38.9%) Secondary Outcome 3 events involved multiple co-occurring component events; in women, 161 of 539 (29.8%) Secondary Outcome 3 events involved multiple co-occurring component events. The most frequently occurring combinations of events were Angina + CABG (men: 155, women: 83) and MI + CABG (men: 86, women: 41).

SUPPLEMENTARY DATA

**Supplementary Table S2.** Association of Baseline BDI Score with Incidence of Look AHEAD Primary and Secondary Outcomes Stepping in Covariates in Three Sequential Models

|                 |        | Baseline BDI Score    |         |                      |         |                      |         |                      |         |
|-----------------|--------|-----------------------|---------|----------------------|---------|----------------------|---------|----------------------|---------|
|                 |        | Primary               |         | Secondary 1          |         | Secondary 2          |         | Secondary 3          |         |
|                 |        | HR (95% CI)           | P-value | HR (95% CI)          | P-value | HR (95% CI)          | P-value | HR (95% CI)          | P-value |
| Model 1         | Male   | 1.030 (1.011, 1.050)  | 0.0024  | 1.017 (0.992, 1.041) | 0.1807  | 1.031 (1.013, 1.049) | 0.0005  | 1.033 (1.017, 1.049) | <0.0001 |
|                 | Female | 1.001 (0.981, 1.022)  | 0.9246  | 0.993 (0.968, 1.019) | 0.6125  | 0.999 (0.982, 1.017) | 0.9444  | 1.001 (0.984, 1.018) | 0.9340  |
| Model 2         | Male   | 1.026 (1.006, 1.047)  | 0.0103  | 1.011 (0.986, 1.037) | 0.3937  | 1.028 (1.010, 1.047) | 0.0023  | 1.032 (1.015, 1.050) | 0.0002  |
|                 | Female | 0.994 (0.973, 1.015)  | 0.5673  | 0.988 (0.962, 1.014) | 0.3582  | 0.994 (0.976, 1.012) | 0.5043  | 0.994 (0.977, 1.011) | 0.4909  |
| Model 2 +       | Male   | 1.028 (1.008, 1.049)  | 0.0069  | 1.011 (0.986, 1.037) | 0.3896  | 1.029 (1.010, 1.047) | 0.0020  | 1.032 (1.051, 1.049) | 0.0002  |
| A1c and insulin | Female | 0.992 (0.9741, 1.013) | 0.4610  | 0.985 (0.959, 1.012) | 0.2807  | 0.992 (0.974, 1.011) | 0.3964  | 0.992 (0.975, 1.010) | 0.3762  |
| Model 2 +       | Male   | 1.025 (1.005, 1.046)  | 0.0129  | 1.010 (0.985, 1.036) | 0.4274  | 1.027 (1.009, 1.046) | 0.0031  | 1.032 (1.015, 1.049) | 0.0002  |
| BP, BP meds     | Female | 0.993 (0.972, 1.015)  | 0.5381  | 0.987 (0.961, 1.013) | 0.3187  | 0.993 (0.975, 1.012) | 0.4867  | 0.993 (0.976, 1.011) | 0.4548  |
| Model 2 +       | Male   | 1.022 (1.001, 1.043)  | 0.0367  | 1.005 (0.797, 1.032) | 0.7065  | 1.026 (1.007, 1.045) | 0.0066  | 1.030 (1.013, 1.047) | 0.0006  |
| lipids and meds | Female | 0.994 (0.972, 1.016)  | 0.5784  | 0.989 (0.962, 1.016) | 0.4062  | 0.996 (0.977, 1.015) | 0.6456  | 0.996 (0.978, 1.013) | 0.6339  |
| Model 2 +       | Male   | 1.026 (1.006, 1.047)  | 0.0108  | 1.011 (0.986, 1.037) | 0.3907  | 1.029 (1.011, 1.048) | 0.0018  | N/A                  |         |
| ABI             | Female | 0.994 (0.973, 1.015)  | 0.5696  | 0.988 (0.962, 1.014) | 0.3650  | 0.994 (0.975, 1.012) | 0.4994  | N/A                  |         |
| Model 2 +       | Male   | 1.026 (1.006, 1.047)  | 0.0114  | 1.010 (0.984, 1.036) | 0.4628  | 1.028 (1.009, 1.046) | 0.0028  | 1.032 (1.015, 1.049) | 0.0002  |
| Smoking         | Female | 0.994 (0.973, 1.015)  | 0.5669  | 0.988 (0.962, 1.014) | 0.3622  | 0.994 (0.976, 1.012) | 0.5072  | 0.994 (0.976, 1.011) | 0.4606  |
| Model 2 +       | Male   | 1.022 (1.002, 1.043)  | 0.0316  | 1.005 (0.980, 1.031) | 0.6910  | 1.024 (1.006, 1.043) | 0.0103  | 1.028 (1.011, 1.046) | 0.0011  |
| METs            | Female | 0.989 (0.968, 1.011)  | 0.3308  | 0.983 (0.957, 1.010) | 0.2102  | 0.990 (0.971, 1.009) | 0.2849  | 0.990 (0.972, 1.007) | 0.2443  |
| Model 2 +       | Male   | N/A                   |         | N/A                  |         | N/A                  |         | N/A                  |         |
| HRT meds        | Female | 0.994 (0.973, 1.015)  | 0.5744  | 0.988 (0.962, 1.014) | 0.3642  | 0.994 (0.976, 1.012) | 0.5109  | 0.994 (0.977, 1.011) | 0.4932  |
| Model 3         | Male   | 1.020 (0.999, 1.041)  | 0.0679  | 0.998 (0.972, 1.025) | 0.9011  | 1.023 (1.004, 1.042) | 0.0178  | 1.026 (1.009, 1.044) | 0.0030  |
|                 | Female | 0.988 (0.966, 1.010)  | 0.2802  | 0.982 (0.956, 1.010) | 0.2019  | 0.991 (0.972, 1.010) | 0.3389  | 0.990 (0.973, 1.008) | 0.2908  |

Model 1: Gender specific model stratified by clinic and including treatment assignment

Model 2: Gender specific model stratified by clinic and including treatment assignment, age (continuous), race/ethnicity, prior CVD, BMI, waist circumference

Model 3: Model 3 + A1c, insulin use, SBP, DBP, antihypertensive use, LDL, HDL, Total Cholesterol, Triglycerides, lipid lowering medication use, ABI outside normal range (<0.9, >1.3) except in Secondary 3, smoking, maximal METs achieved, HRT (females only)

SUPPLEMENTARY DATA

**Supplementary Table S3.** Association of Baseline ADM Use with Incidence of Look AHEAD Primary and Secondary Outcomes Stepping in Baseline Covariates in Three Sequential Models

|                 |        | Baseline ADM use     |         |                      |         |                      |         |                      |         |
|-----------------|--------|----------------------|---------|----------------------|---------|----------------------|---------|----------------------|---------|
|                 |        | Primary              |         | Secondary 1          |         | Secondary 2          |         | Secondary 3          |         |
|                 |        | HR (95% CI)          | P-value |
| Model 1         | Male   | 0.986 (0.746, 1.304) | 0.9222  | 0.836 (0.586, 1.194) | 0.3256  | 1.046 (0.818, 1.337) | 0.7227  | 1.103 (0.880, 1.382) | 0.3945  |
|                 | Female | 0.796 (0.601, 1.055) | 0.1128  | 0.919 (0.662, 1.278) | 0.6165  | 0.796 (0.623, 1.016) | 0.0668  | 0.804 (0.639, 1.011) | 0.0619  |
| Model 2         | Male   | 0.989 (0.745, 1.314) | 0.9401  | 0.804 (0.560, 1.156) | 0.2389  | 1.063 (0.826, 1.367) | 0.6356  | 1.121 (0.890, 1.412) | 0.334   |
|                 | Female | 0.793 (0.596, 1.057) | 0.1135  | 0.932 (0.667, 1.303) | 0.6808  | 0.779 (0.607, 0.998) | 0.0482  | 0.807 (0.640, 1.019) | 0.0721  |
| Model 2 +       | Male   | 0.797 (0.737, 1.301) | 0.8850  | 0.782 (0.544, 1.124) | 0.1840  | 1.050 (0.816, 1.351) | 0.7019  | 1.109 (0.881, 1.397) | 0.3785  |
| A1c and insulin | Female | 0.770 (0.577, 1.027) | 0.0755  | 0.906 (0.647, 1.269) | 0.5650  | 0.764 (0.596, 0.980) | 0.0340  | 0.798 (0.631, 1.008) | 0.0578  |
| Model 2 +       | Male   | 0.963 (0.724, 1.280) | 0.7955  | 0.781 (0.543, 1.124) | 0.1836  | 1.038 (0.807, 1.337) | 0.7708  | 1.086 (0.861, 1.369) | 0.4882  |
| BP, BP meds     | Female | 0.781 (0.586, 1.041) | 0.0916  | 0.910 (0.651, 1.273) | 0.5830  | 0.773 (0.603, 0.991) | 0.0420  | 0.801 (0.634, 1.011) | 0.0618  |
| Model 2 +       | Male   | 1.049 (0.788, 1.398) | 0.7422  | 0.850 (0.590, 1.224) | 0.3820  | 1.134 (0.879, 1.462) | 0.3324  | 1.182 (0.936, 1.491) | 0.1594  |
| lipids and meds | Female | 0.774 (0.577, 1.040) | 0.0889  | 0.930 (0.662, 1.306) | 0.6735  | 0.773 (0.600, 0.996) | 0.0468  | 0.806 (0.635, 1.022) | 0.0753  |
| Model 2 +       | Male   | 0.987 (0.743, 1.311) | 0.9275  | 0.802 (0.558, 1.153) | 0.2330  | 1.065 (0.828, 1.370) | 0.6245  | N/A                  |         |
| ABI             | Female | 0.794 (0.596, 1.057) | 0.1138  | 0.931 (0.666, 1.302) | 0.6774  | 0.779 (0.608, 0.999) | 0.0490  | N/A                  |         |
| Model 2 +       | Male   | 0.971 (0.729, 1.293) | 0.8387  | 0.775 (0.537, 1.118) | 0.1732  | 1.044 (0.810, 1.346) | 0.7370  | 1.108 (0.878, 1.398) | 0.3871  |
| Smoking         | Female | 0.791 (0.594, 1.054) | 0.1090  | 0.928 (0.664, 1.297) | 0.6606  | 0.776 (0.605, 0.995) | 0.0452  | 0.804 (0.637, 1.015) | 0.0666  |
| Model 2 +       | Male   | 0.940 (0.707, 1.250) | 0.6715  | 0.755 (0.525, 1.086) | 0.1297  | 1.013 (0.787, 1.304) | 0.9212  | 1.069 (0.848, 1.347) | 0.5748  |
| METs            | Female | 0.742 (0.556, 0.990) | 0.0422  | 0.873 (0.623, 1.221) | 0.4269  | 0.738 (0.575, 0.947) | 0.0168  | 0.761 (0.603, 0.962) | 0.0225  |
| Model 2 +       | Male   | N/A                  |         | N/A                  |         | N/A                  |         | N/A                  |         |
| HRT meds        | Female | 0.794 (0.596, 1.058) | 0.1153  | 0.936 (0.670, 1.309) | 0.6989  | 0.779 (0.608, 0.999) | 0.0489  | 0.806 (0.639, 1.018) | 0.0707  |
| Model 3         | Male   | 0.949 (0.709, 1.270) | 0.7233  | 0.720 (0.495, 1.046) | 0.0846  | 1.033 (0.798, 1.337) | 0.8061  | 1.072 (0.847, 1.357) | 0.3350  |
|                 | Female | 0.708 (0.526, 0.954) | 0.0234  | 0.858 (0.608, 1.210) | 0.3829  | 0.723 (0.559, 0.935) | 0.0133  | 0.755 (0.594, 0.960) | 0.0217  |

Model 1: Gender specific model stratified by clinic and including treatment assignment

Model 2: Gender specific model stratified by clinic and including treatment assignment, age (continuous), race/ethnicity, prior CVD, BMI, waist circumference

Model 3: Model 3 + A1c, insulin use, SBP, DBP, antihypertensive use, LDL, HDL, Total Cholesterol, Triglycerides, lipid lowering medication use, ABI outside normal range (<0.9, >1.3) except in Secondary 3, smoking, maximal METs achieved, HRT (females only)

SUPPLEMENTARY DATA

**Supplementary Table S4.** Association of Baseline BDI $\geq$ 10 with Incidence of Look AHEAD Primary and Secondary Outcomes Stepping in Baseline Covariates in Three Sequential Models

|                 |        | Baseline BDI $\geq$ 10 |         |                      |         |                      |         |                      |         |
|-----------------|--------|------------------------|---------|----------------------|---------|----------------------|---------|----------------------|---------|
|                 |        | Primary                |         | Secondary 1          |         | Secondary 2          |         | Secondary 3          |         |
|                 |        | HR (95% CI)            | P-value | HR (95% CI)          | P-value | HR (95% CI)          | P-value | HR (95% CI) in       | P-value |
| Model 1         | Male   | 1.243 (0.963, 1.605)   | 0.0945  | 1.209 (0.886, 1.650) | 0.2304  | 1.227 (0.977, 1.542) | 0.0785  | 1.308 (1.061, 1.612) | 0.0120  |
|                 | Female | 0.901 (0.689, 1.177)   | 0.4451  | 0.780 (0.556, 1.093) | 0.1491  | 0.899 (0.714, 1.133) | 0.3676  | 0.874 (0.702, 1.087) | 0.2255  |
| Model 2         | Male   | 1.233 (0.952, 1.595)   | 0.1119  | 1.142 (0.835, 1.561) | 0.4071  | 1.220 (0.968, 1.538) | 0.0920  | 1.351 (1.093, 1.671) | 0.0054  |
|                 | Female | 0.868 (0.663, 1.136)   | 0.3031  | 0.756 (0.538, 1.062) | 0.1068  | 0.873 (0.692, 1.101) | 0.2520  | 0.837 (0.671, 1.043) | 0.1122  |
| Model 2 +       | Male   | 1.253 (0.965, 1.626)   | 0.0901  | 1.218 (0.887, 1.672) | 0.2236  | 1.220 (0.966, 1.542) | 0.0953  | 1.330 (1.074, 1.649) | 0.0091  |
| A1c and insulin | Female | 0.840 (0.641, 1.100)   | 0.2044  | 0.732 (0.520, 1.029) | 0.0726  | 0.846 (0.670, 1.068) | 0.1589  | 0.812 (0.651, 1.012) | 0.0642  |
| Model 2 +       | Male   | 1.224 (0.946, 1.584)   | 0.1241  | 1.209 (0.883, 1.656) | 0.2360  | 1.213 (0.962, 1.528) | 0.1019  | 1.348 (1.090, 1.667) | 0.0058  |
| BP, BP meds     | Female | 0.865 (0.660, 1.133)   | 0.2911  | 0.749 (0.533, 1.054) | 0.0972  | 0.872 (0.691, 1.100) | 0.2480  | 0.835 (0.670, 1.041) | 0.1088  |
| Model 2 +       | Male   | 1.178 (0.906, 1.533)   | 0.2220  | 1.150 (0.833, 1.587) | 0.3957  | 1.190 (0.940, 1.506) | 0.1475  | 1.327 (1.070, 1.646) | 0.0099  |
| lipids and meds | Female | 0.840 (0.638, 1.107)   | 0.2165  | 0.774 (0.549, 1.089) | 0.1416  | 0.857 (0.675, 1.087) | 0.2033  | 0.827 (0.660, 1.035) | 0.0974  |
| Model 2 +       | Male   | 1.234 (0.953, 1.598)   | 0.1104  | 1.223 (0.893, 1.675) | 0.2097  | 1.224 (0.971, 1.543) | 0.0871  | N/A                  |         |
| ABI             | Female | 0.867 (0.662, 1.135)   | 0.2982  | 0.758 (0.539, 1.065) | 0.1101  | 0.870 (0.689, 1.098) | 0.2405  | N/A                  |         |
| Model 2 +       | Male   | 1.220 (0.941, 1.582)   | 0.1338  | 1.180 (0.859, 1.620) | 0.3075  | 1.205 (0.955, 1.522) | 0.1158  | 1.338 (1.081, 1.656) | 0.0075  |
| Smoking         | Female | 0.867 (0.663, 1.136)   | 0.3005  | 0.756 (0.538, 1.062) | 0.1066  | 0.873 (0.692, 1.101) | 0.2504  | 0.837 (0.672, 1.043) | 0.1137  |
| Model 2 +       | Male   | 1.199 (0.926, 1.552)   | 0.1687  | 1.168 (0.853, 1.600) | 0.3321  | 1.183 (0.938, 1.491) | 0.1557  | 1.315 (1.064, 1.627) | 0.0114  |
| METs            | Female | 0.834 (0.637, 1.093)   | 0.1877  | 0.727 (0.517, 1.022) | 0.0666  | 0.842 (0.667, 1.064) | 0.1495  | 0.804 (0.645, 1.003) | 0.0531  |
| Model 2 +       | Male   | N/A                    |         | N/A                  |         | N/A                  |         | N/A                  |         |
| HRT meds        | Female | 0.869 (0.664, 1.137)   | 0.3063  | 0.756 (0.538, 1.062) | 0.1069  | 0.874 (0.692, 1.102) | 0.2547  | 0.837 (0.672, 1.043) | 0.1127  |
| Model 3         | Male   | 1.147 (0.875, 1.503)   | 0.3199  | 1.048 (0.754, 1.459) | 0.7787  | 1.143 (0.898, 1.455) | 0.2782  | 1.261 (1.012, 1.571) | 0.0387  |
|                 | Female | 0.784 (0.594, 1.035)   | 0.0860  | 0.729 (0.517, 1.029) | 0.0726  | 0.808 (0.636, 1.027) | 0.0815  | 0.781 (0.623, 0.980) | 0.0325  |

Model 1: Gender specific model stratified by clinic and including treatment assignment

Model 2: Gender specific model stratified by clinic and including treatment assignment, age (continuous), race/ethnicity, gender, prior CVD, BMI, waist circumference

Model 3: Model 3 + A1c, insulin use, SBP, DBP, antihypertensive use, LDL, HDL, Total Cholesterol, Triglycerides, lipid lowering medication use, ABI outside normal range (<0.9, >1.3) except in Secondary 3, smoking, maximal METs achieved, HRT (females only)
